# Supplementary material for: The Nek2 centrosome-mitotic kinase contributes to the mesenchymal state, cell invasion, and migration of triple-negative breast cancer cells
Source: PubMed Central journal article supplement (PMC8079711; doi:10.1038/s41598-021-88512-0), 2021-04-27

**The Nek2 centrosome-mitotic kinase contributes to the mesenchymal state, cell invasion, and migration of triple-negative breast cancer cells.**

Yainyrette Rivera-Rivera<sup>1\*</sup>, Mihaela Marina<sup>2\*</sup>, Shirley Jusino<sup>1</sup>,  
Miyoung Lee<sup>3</sup>, Jaleisha Vélez Velázquez<sup>4</sup>, Camille Chardón-Colón<sup>1</sup>,  
Geraldine Vargas<sup>1</sup>, Jaya Padmanabhan<sup>5</sup>, Srikumar P. Chellappan<sup>5</sup>,  
and Harold I. Saavedra<sup>1</sup>

**Supplementary Figure 1. Nek2 mRNA expression in different breast cancer subtypes using OncoPrint**

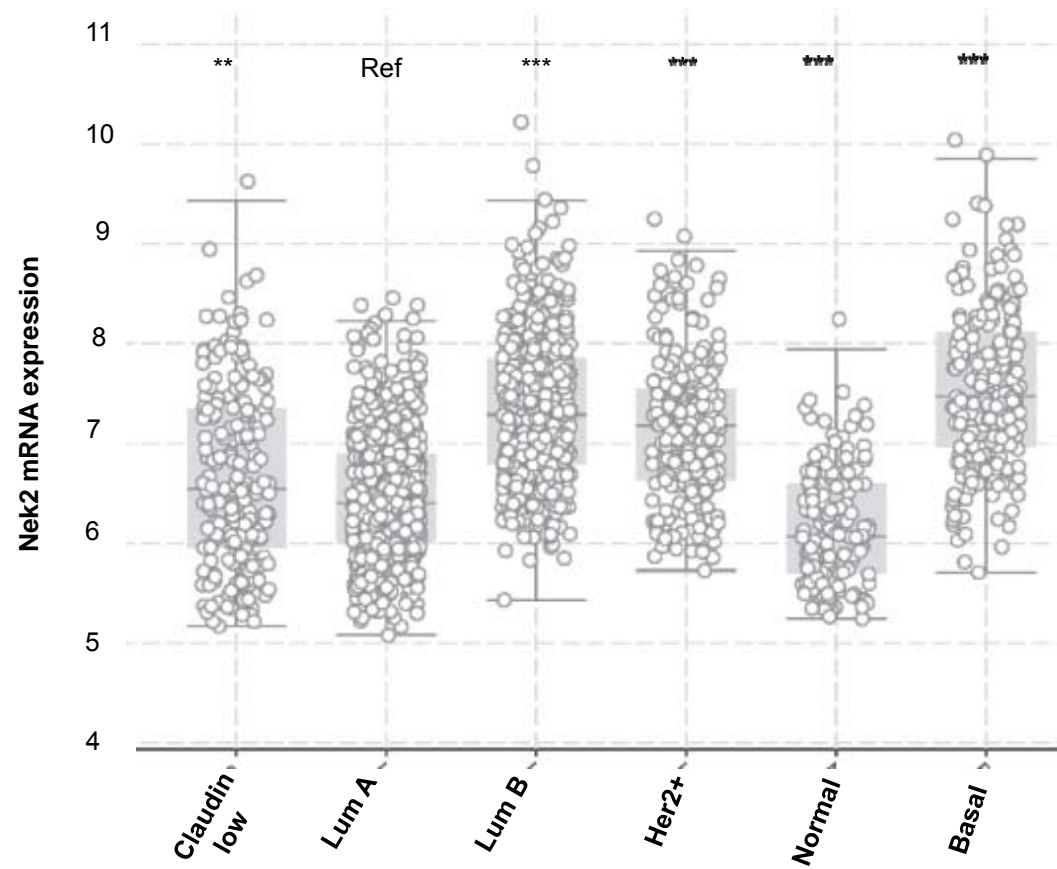

Supplementary Figure 2. Nek2 overexpression causes chromosome instability.

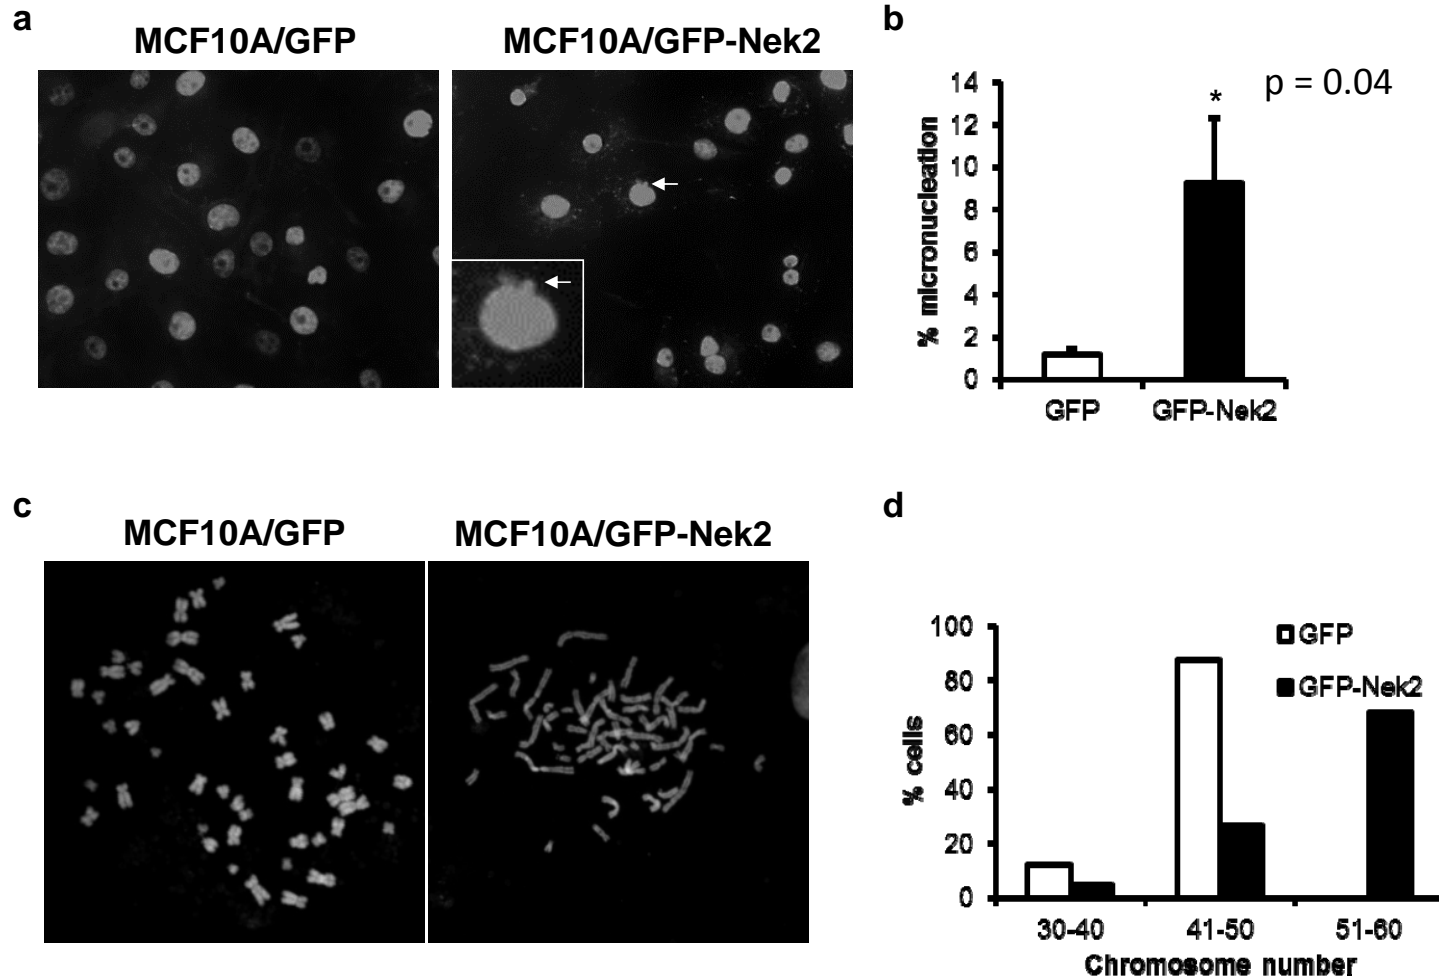

Supplementary Figure 3. Nek2 overexpression increases organoid size

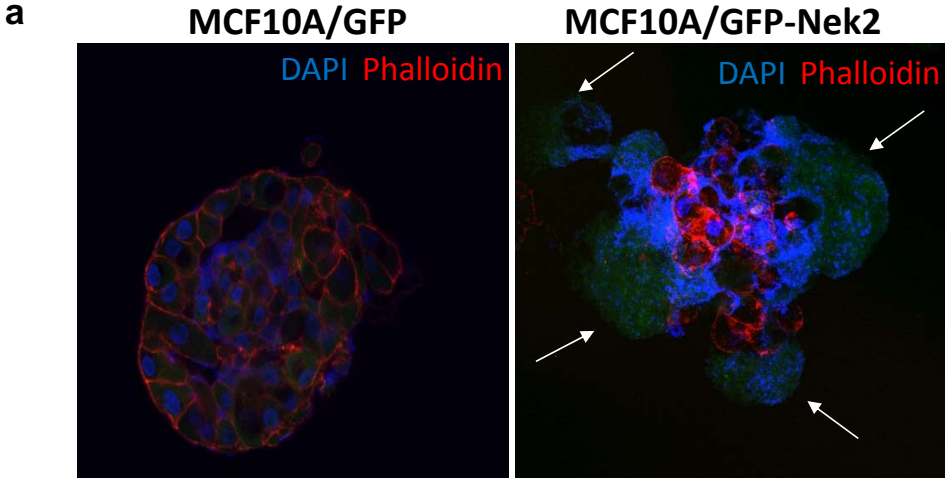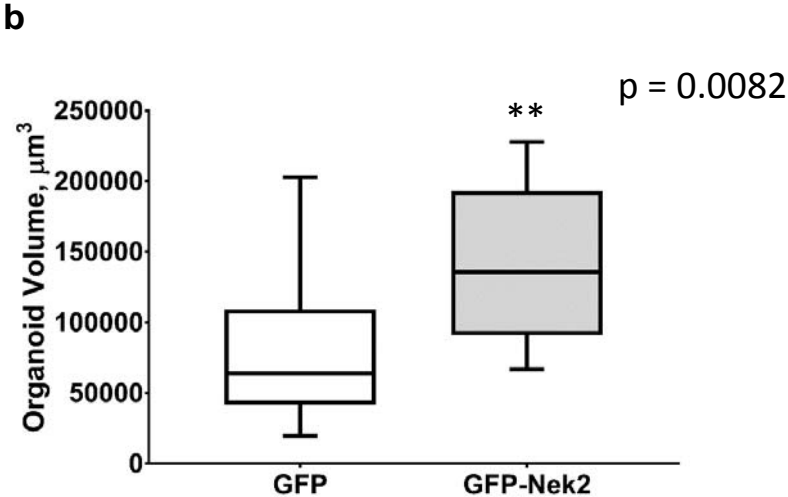

### Supplementary Figure 4. Nek2 overexpression increases cell spreading

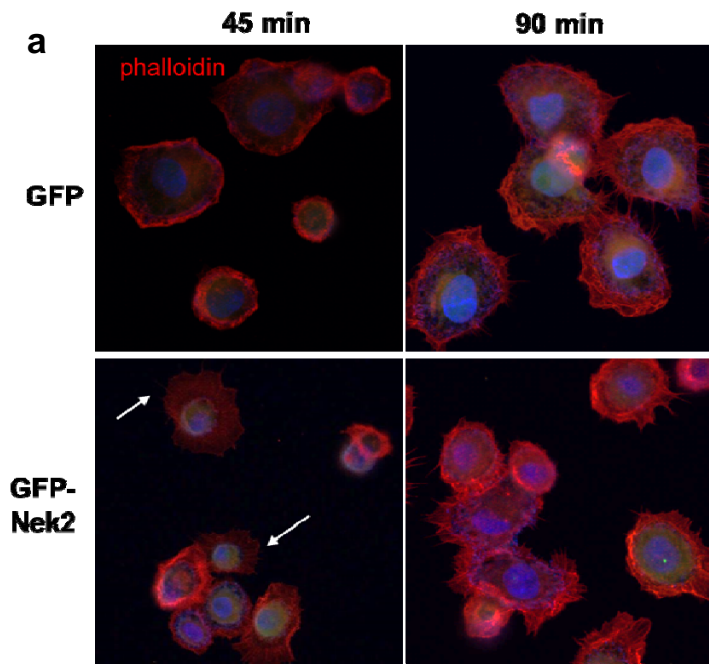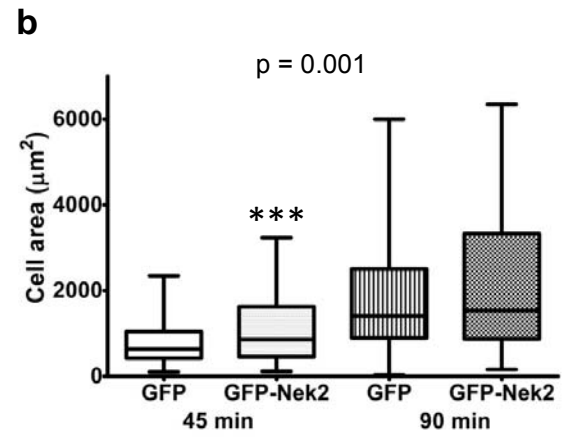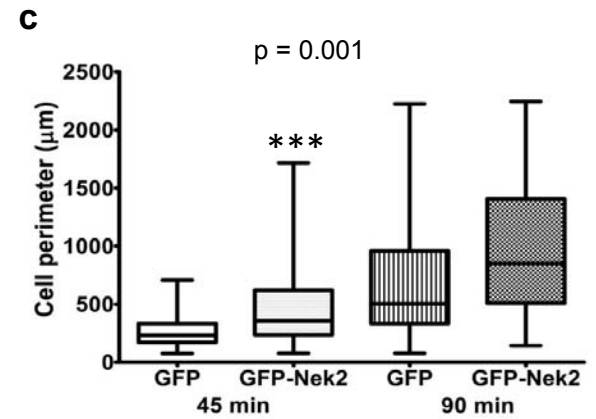

**Supplementary Table 1. Gene expression of Nek2 in different molecular breast cancer subtypes**

|                                               | Luminal A | Luminal B | Basal  | Her2+  | Normal-Like | Claudin-Low |
|-----------------------------------------------|-----------|-----------|--------|--------|-------------|-------------|
| Number of patients with the indicated subtype | 679       | 461       | 199    | 220    | 140         | 199         |
| Number of patients overexpressing Nek2        | 0         | 24        | 20     | 10     | 0           | 5           |
| Percentage of patients overexpressing Nek2    | 0         | 5.2 %     | 10 %   | 4.5 %  | 0 %         | 2.5 %       |
| Number of patients with Amplified Nek2        | 215       | 121       | 25     | 40     | 15          | 15          |
| Percentage of patients with Amplified Nek2    | 31.7 %    | 26.2 %    | 12.6 % | 18.2 % | 10.7 %      | 7.5 %       |

**Supplementary Table 2. Nek2 overexpression causes mitotic perturbations**

| <b>Phenotype</b>    | <b>%</b>          |                        |
|---------------------|-------------------|------------------------|
|                     | <b>MCF10A/GFP</b> | <b>MCF10A/GFP-Nek2</b> |
| Normal division     | 98.67             | 68.06                  |
| Tripolar division   | 0.44              | 3.47                   |
| Binucleation        | 0.44              | 12.5                   |
| Cytokinesis defects | 0                 | 10.42                  |
| Cell death          | 0.44              | 5.56                   |

## Supplementary Figure 5. String analysis predicted interactions between Nek2 and EMT proteins.

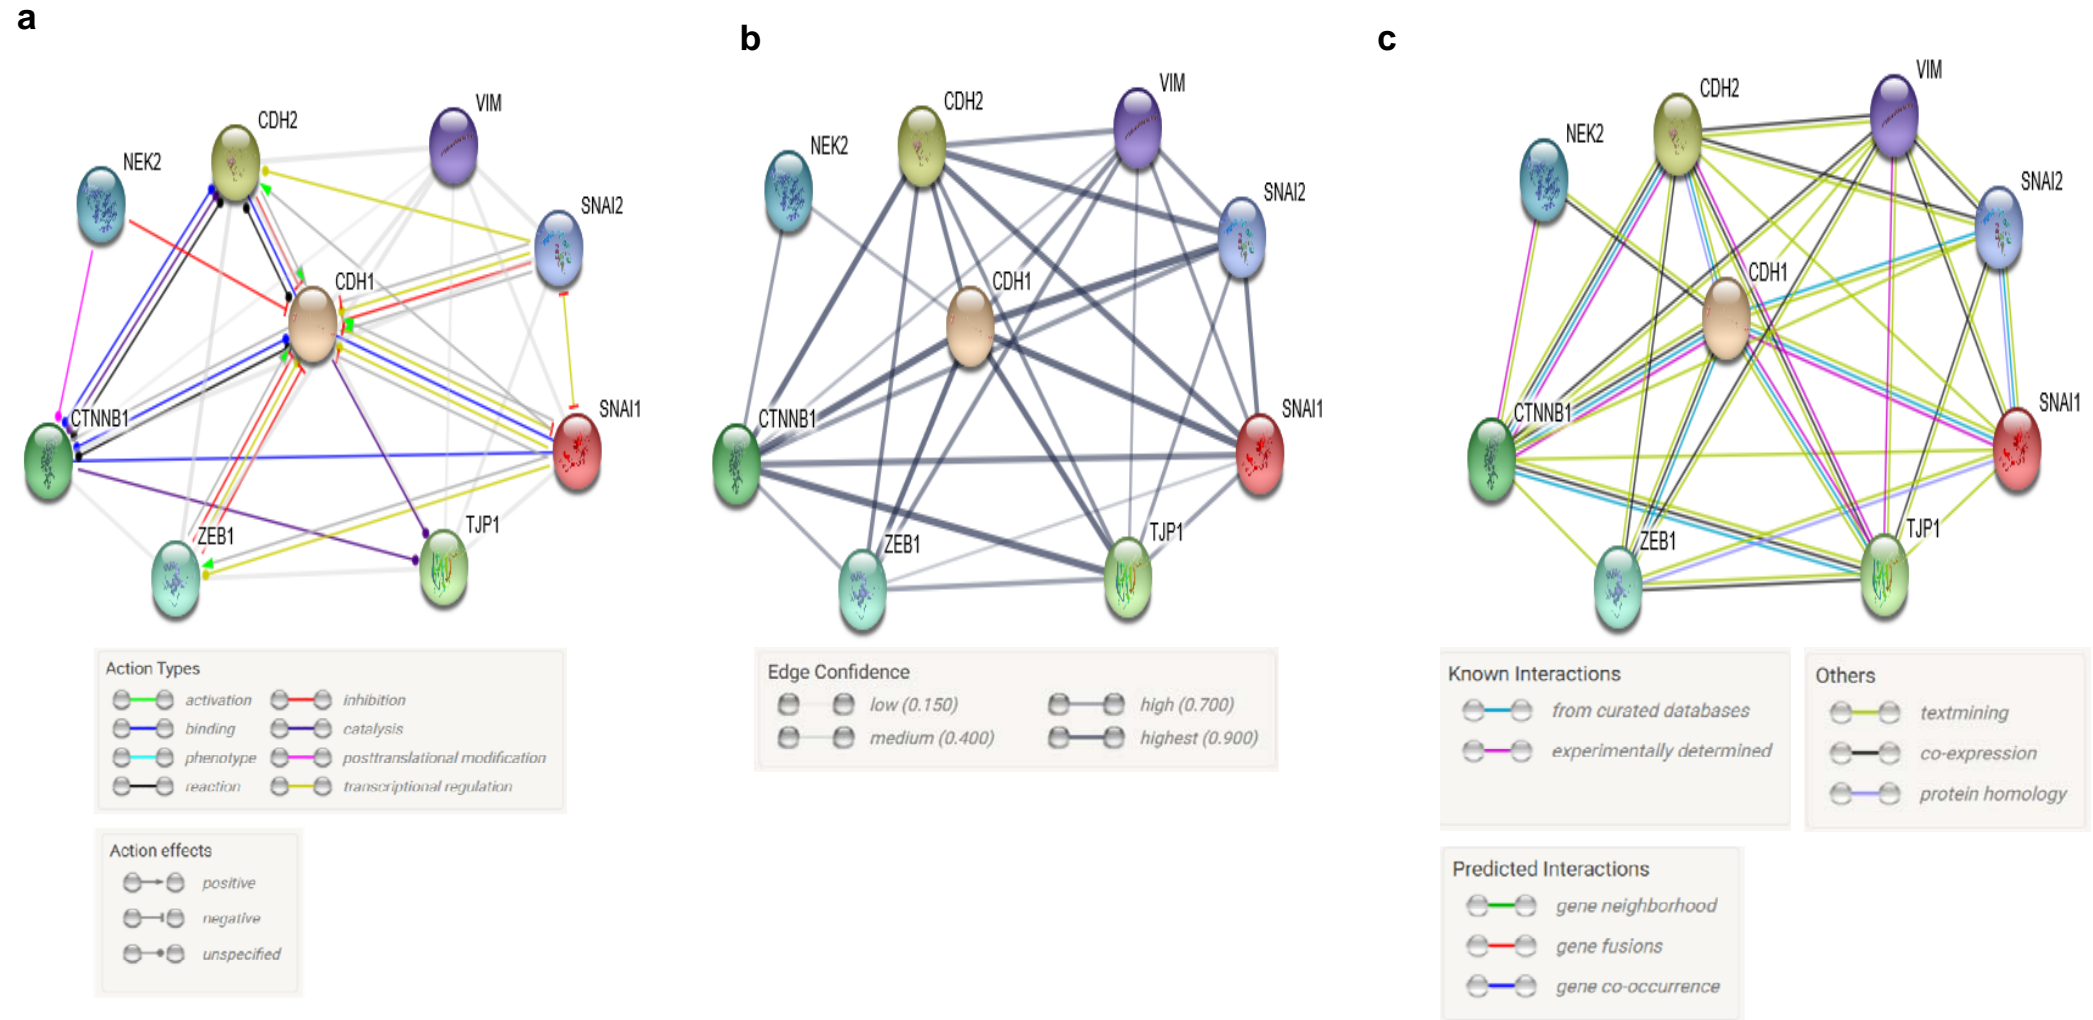



## Supplementary Figure 6. The INH-6 Nek2 inhibitor suppresses EMT markers

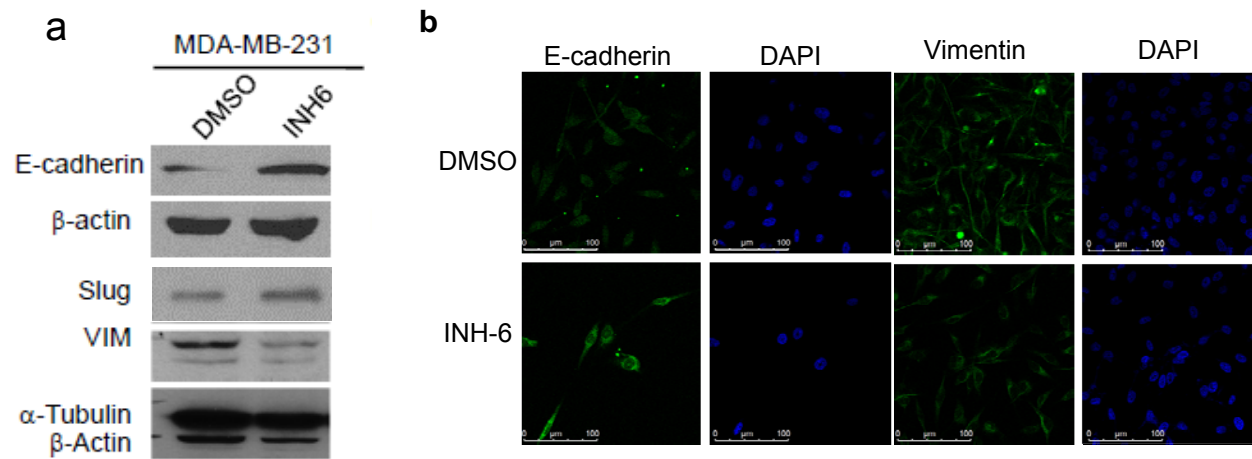

### Original Western Blots for Fig. 1a.

MCF10A

GFP  
GFP-Nek2

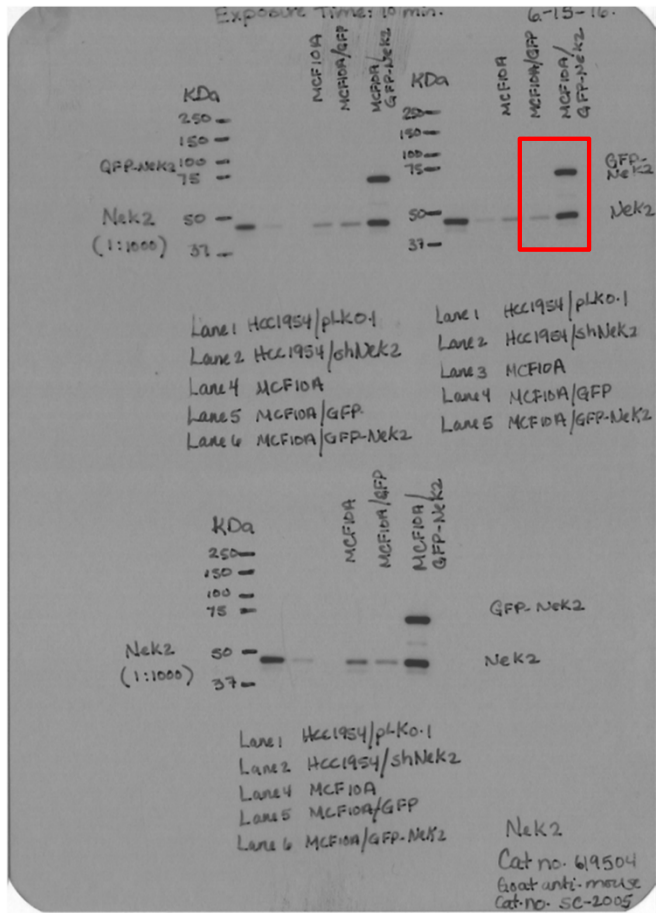

GFP-Nek2  
Nek2

MCF10A

GFP  
GFP-Nek2

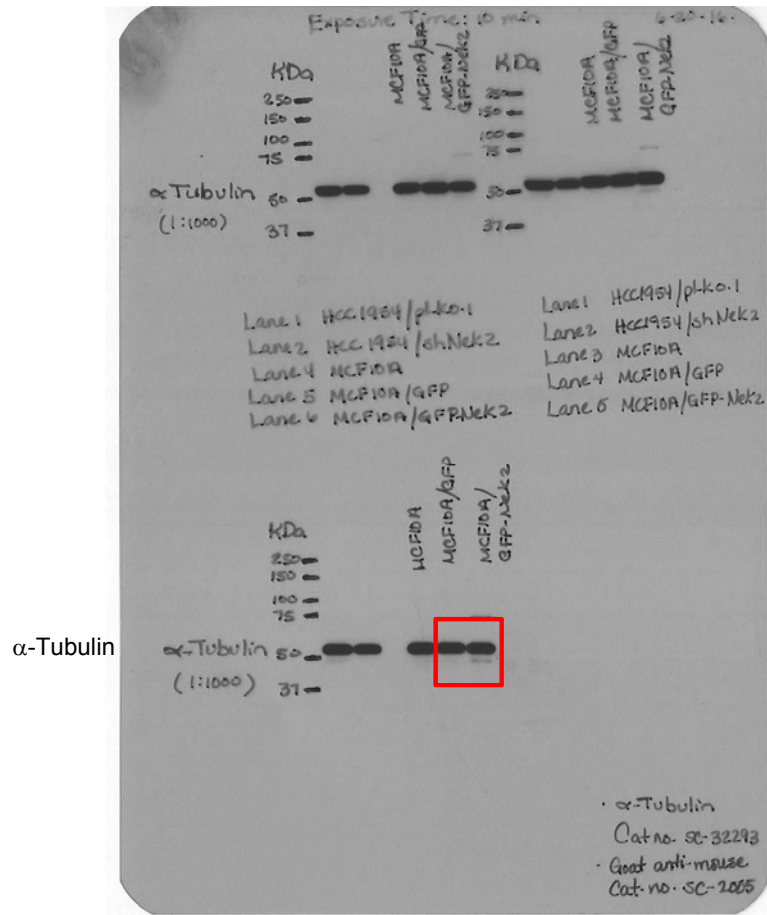

$\alpha$ -Tubulin

### Original Western Blots for Fig. 2b and c

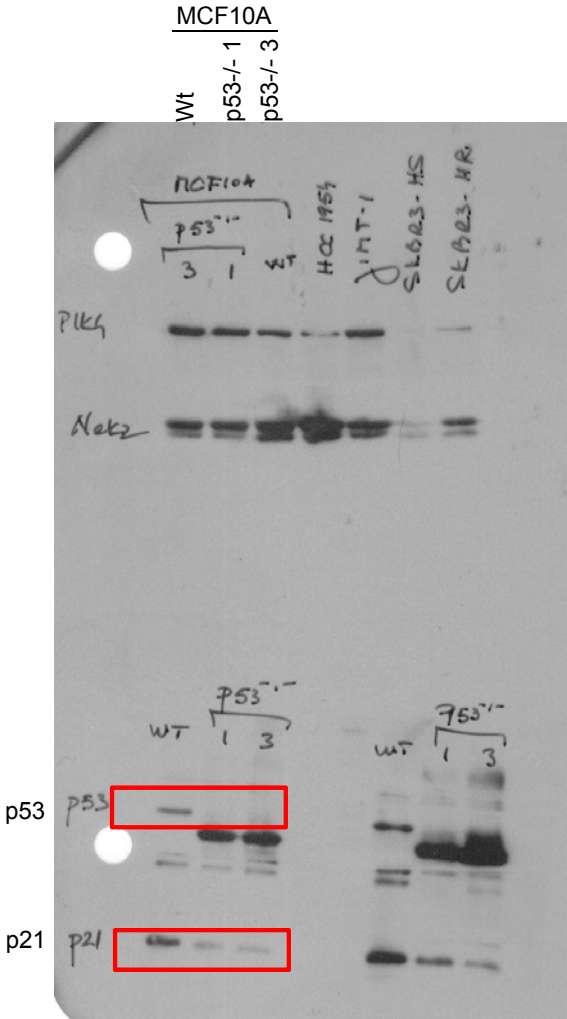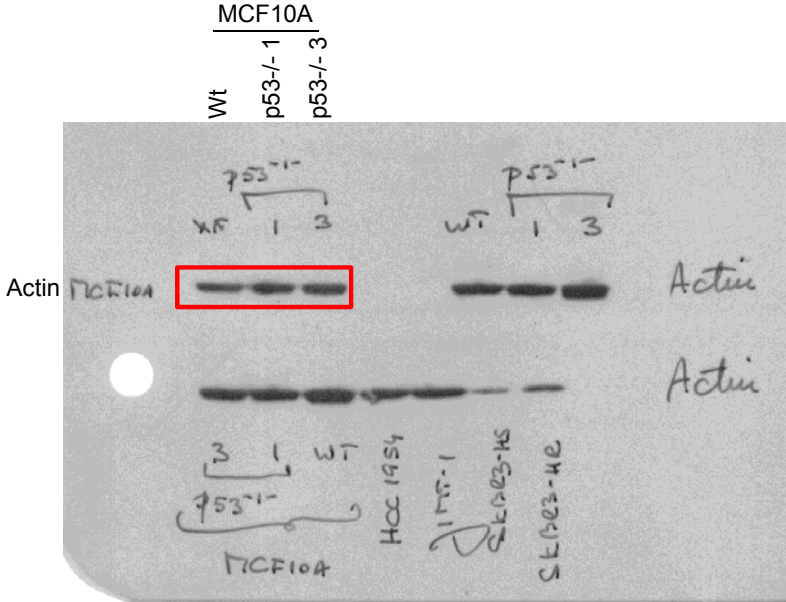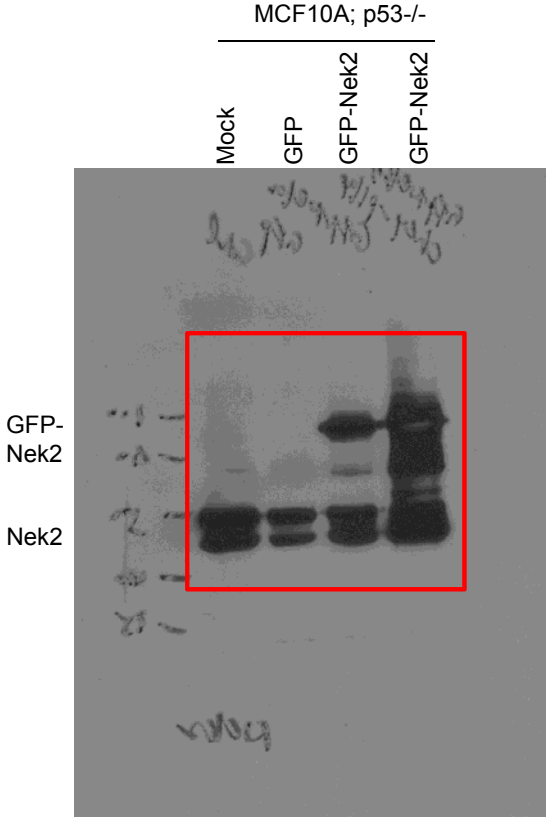

Original Western Blots for Fig. 3a

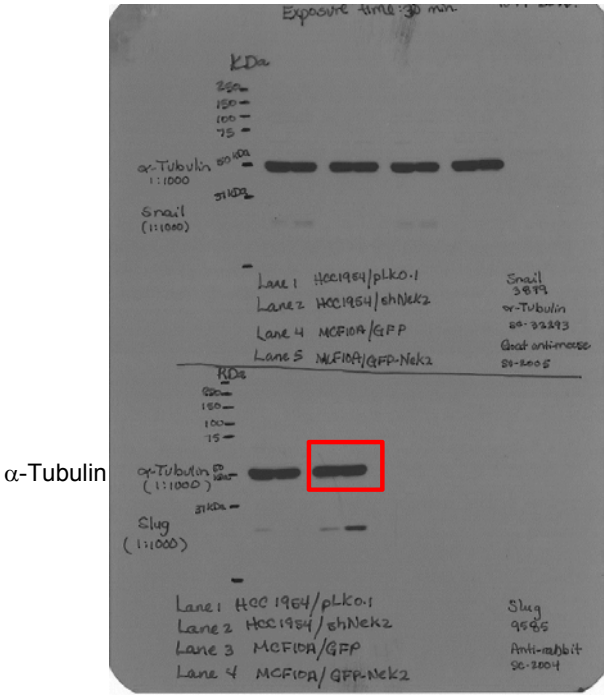

GFP  
GFP-Nek2  
MCF10A

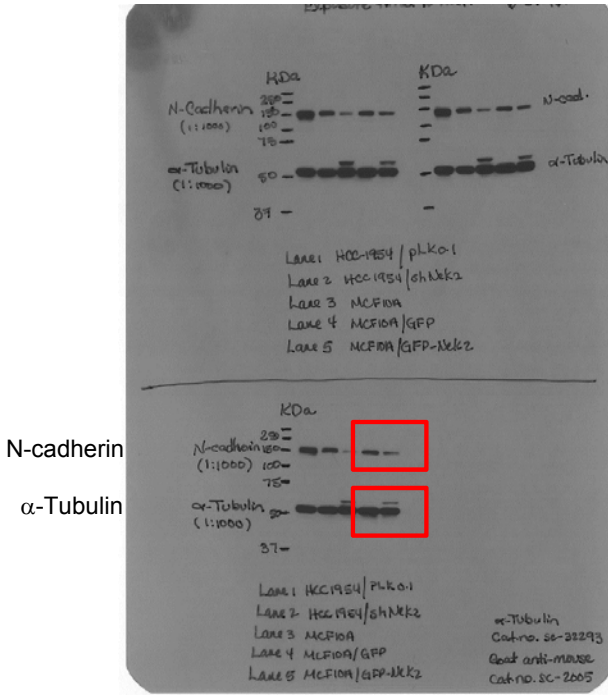

GFP  
GFP-Nek2  
MCF10A

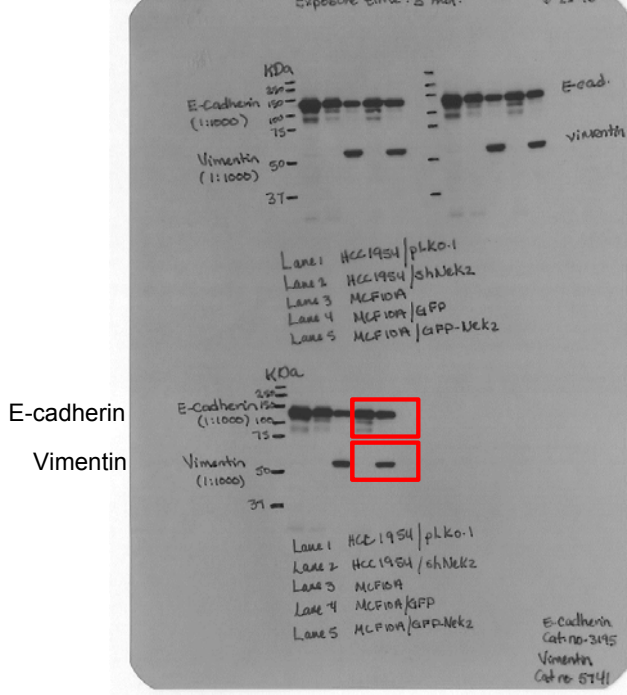

GFP  
GFP-Nek2  
MCF10A

### Original Western Blots for Fig. 3b

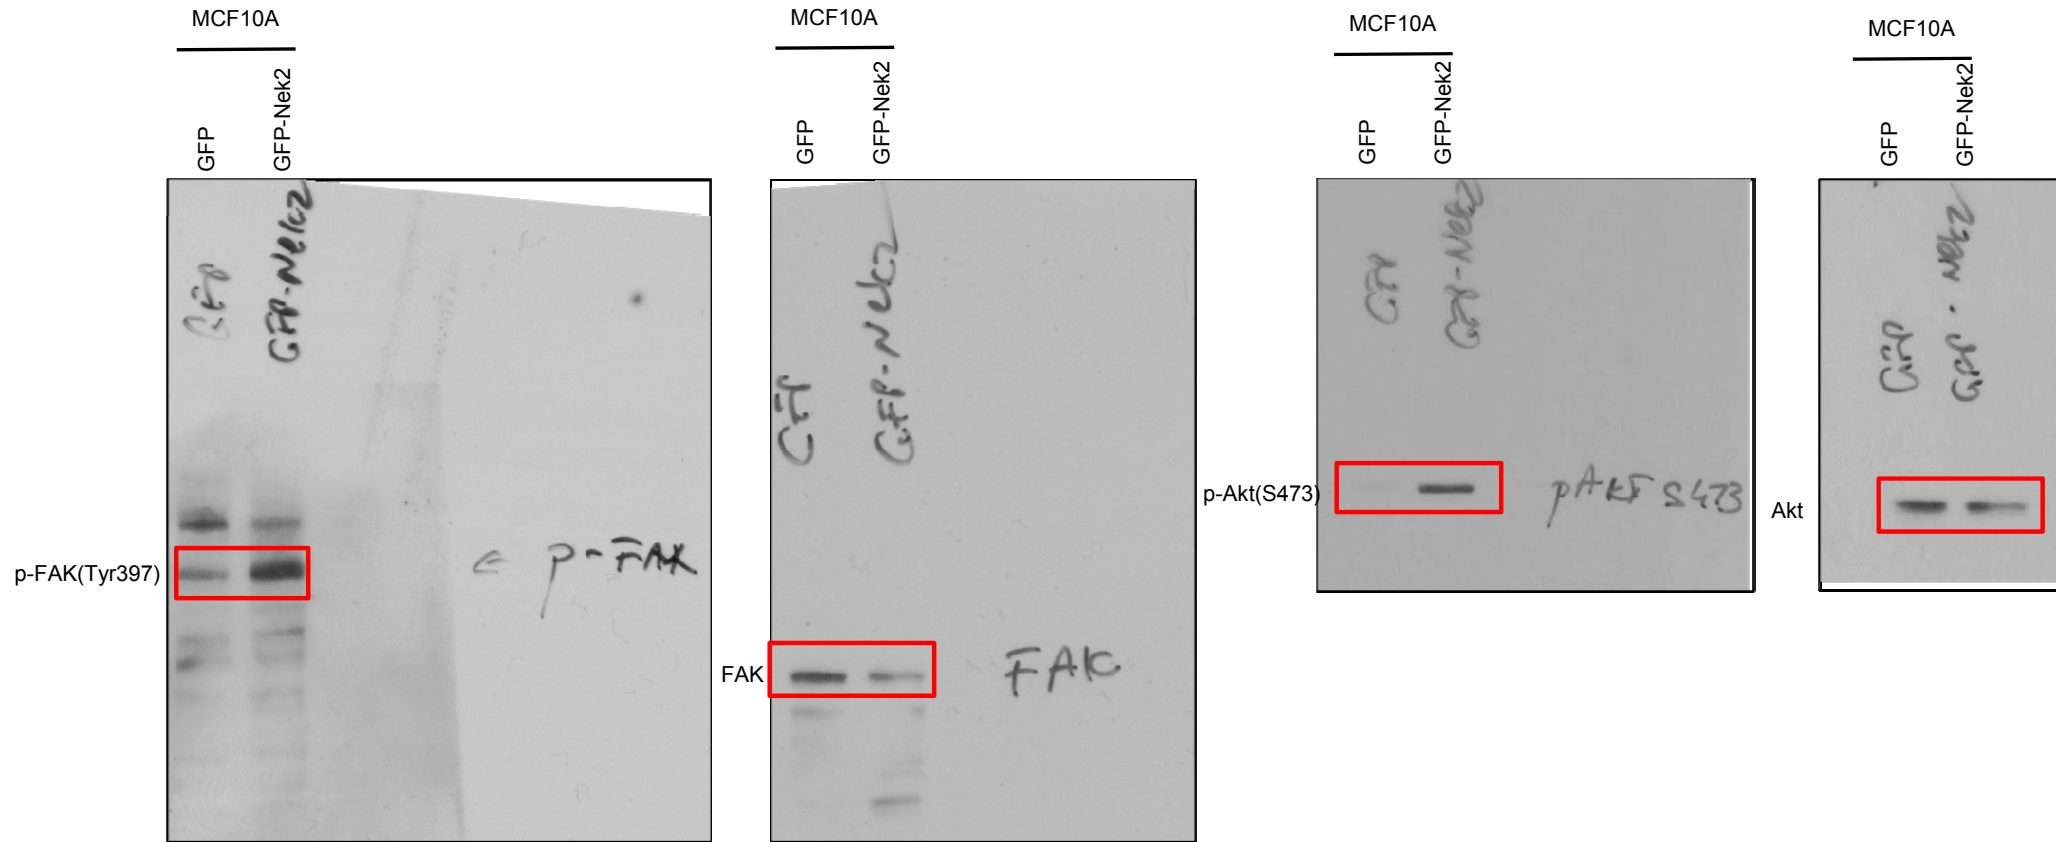

Original Western Blots for Fig. 3c

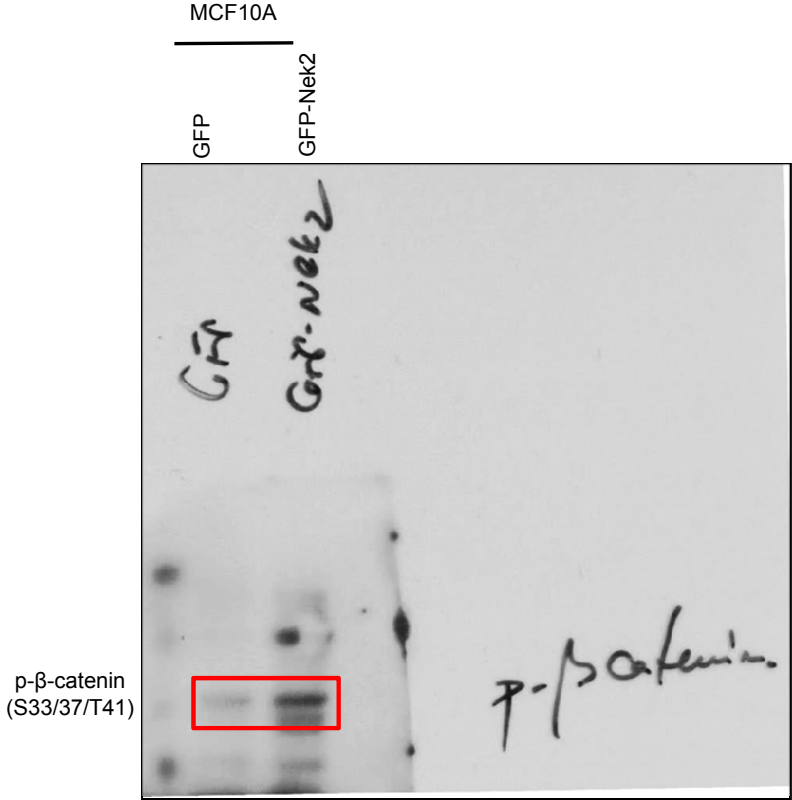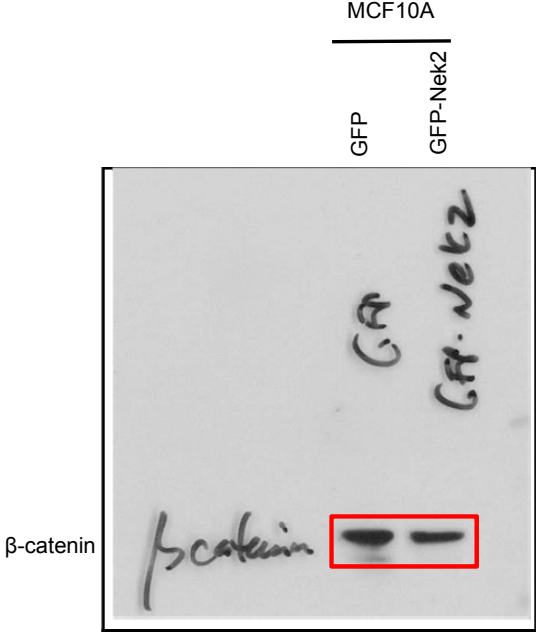

### Original Western Blots for Fig. 3d

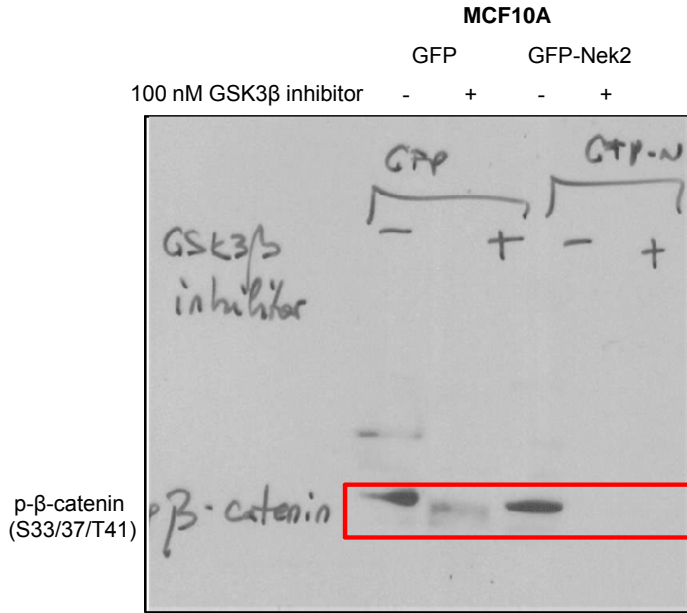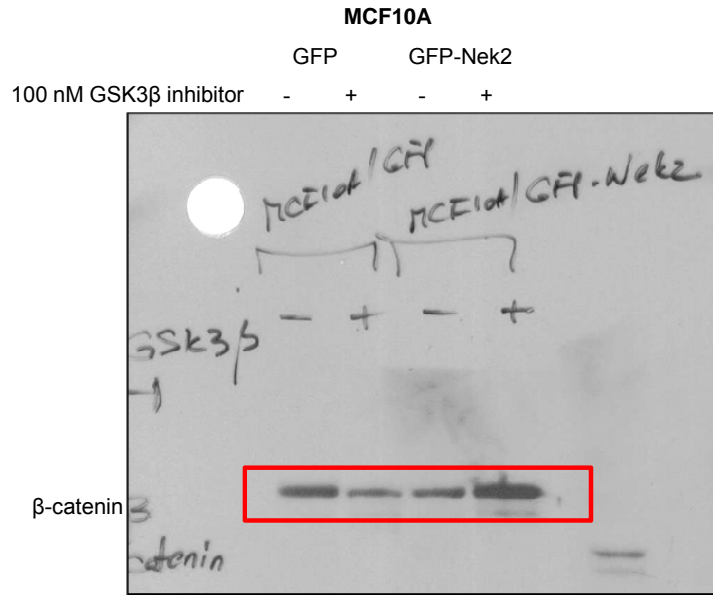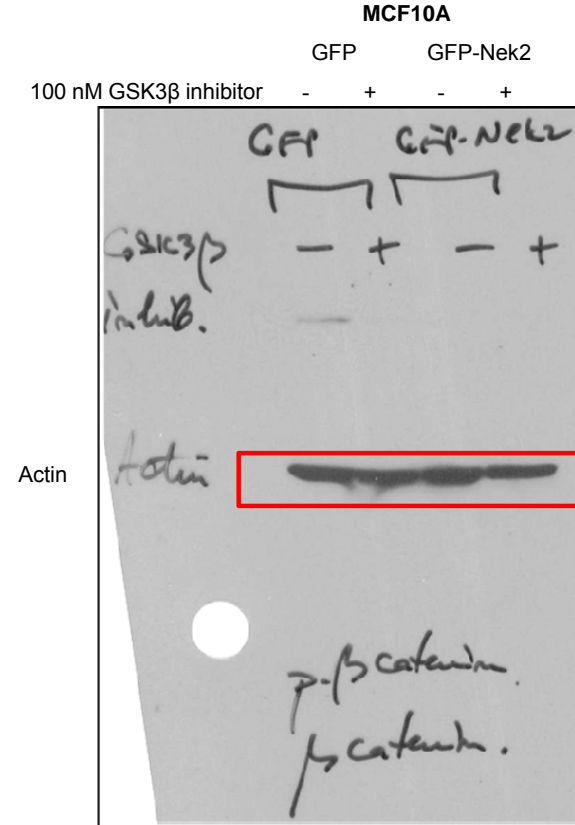



### Original Western Blots for Fig. 4 a-b

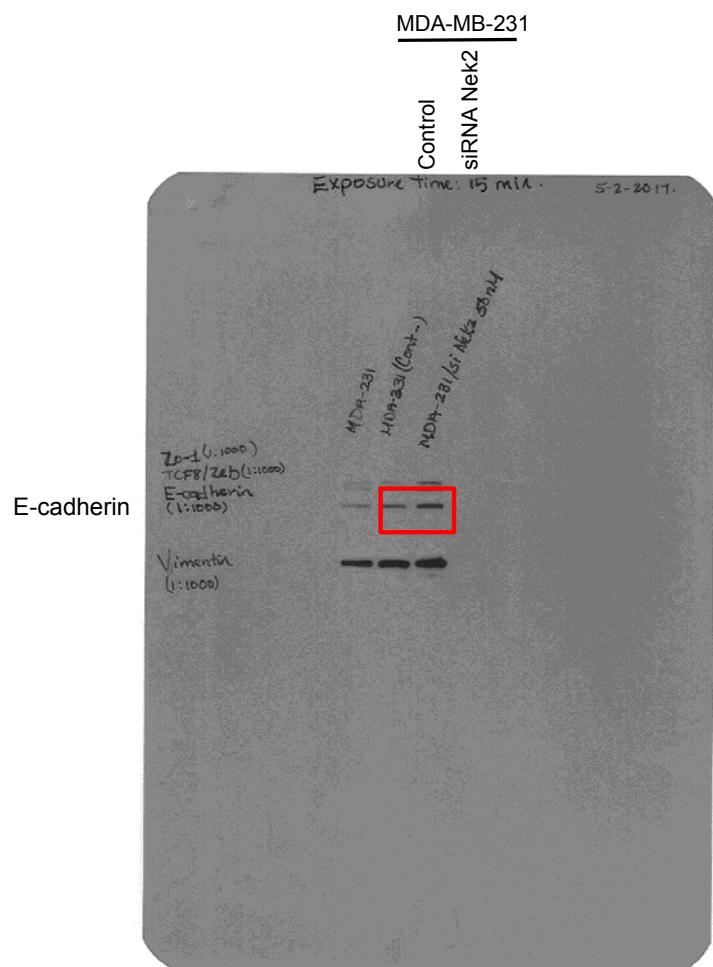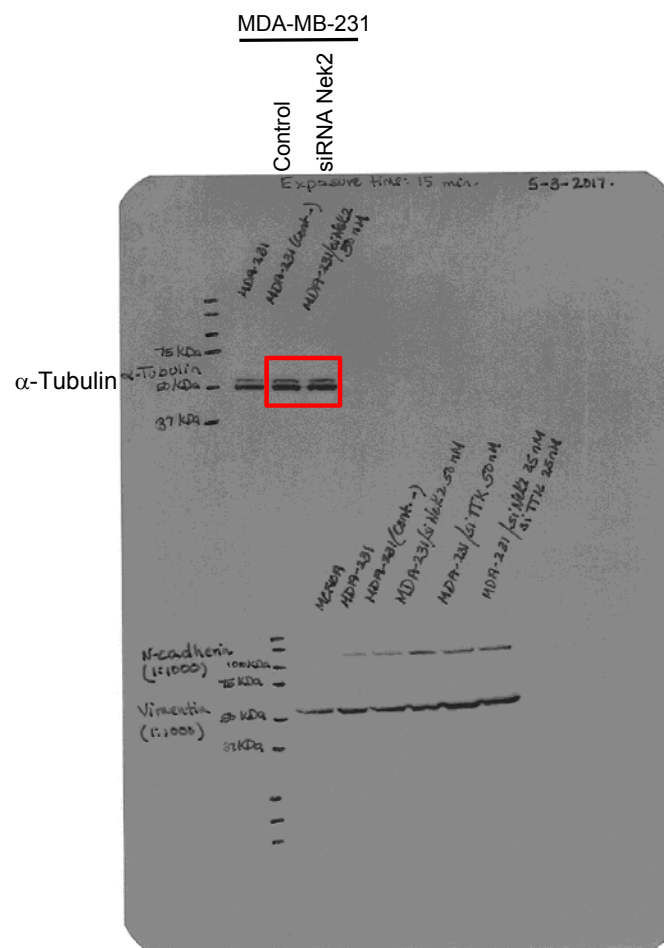



### Original Western Blots for MDA-MB-231 and Hs578t (Fig. 4 a-b)

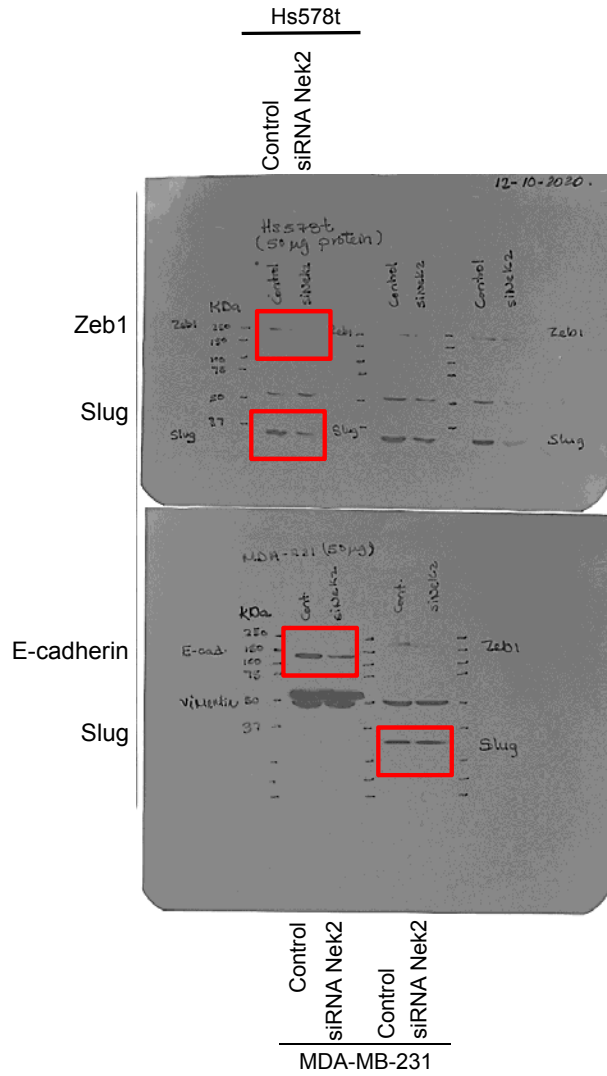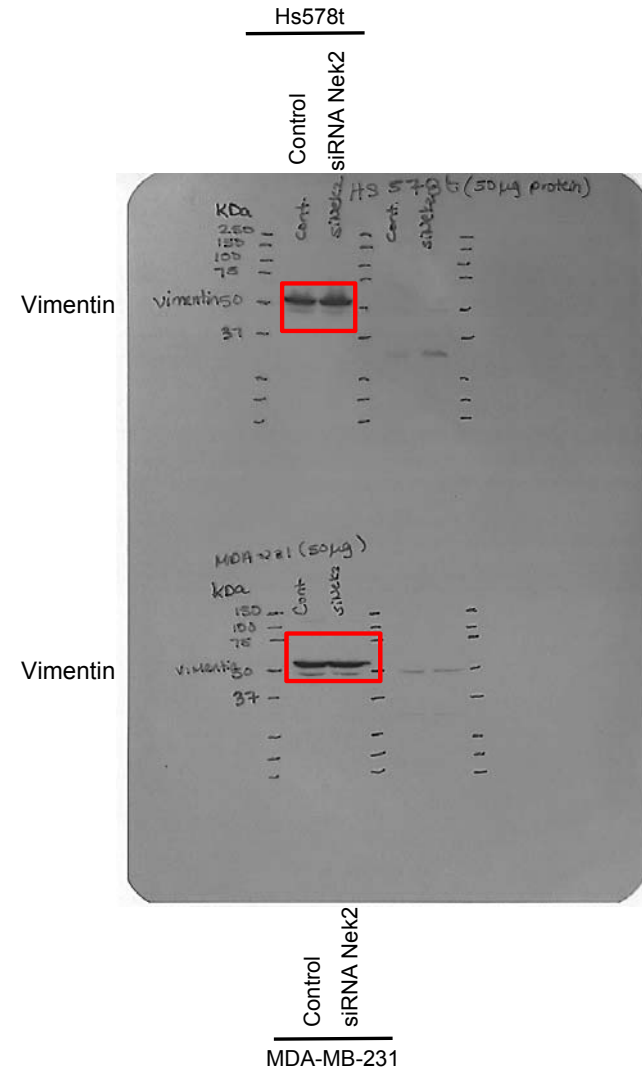

Original Western Blots for Fig. 4 a-b

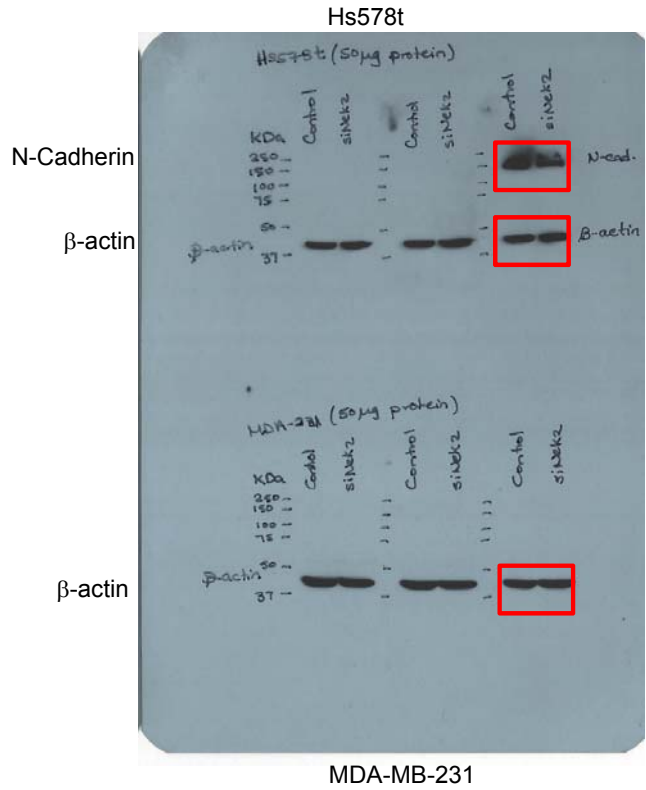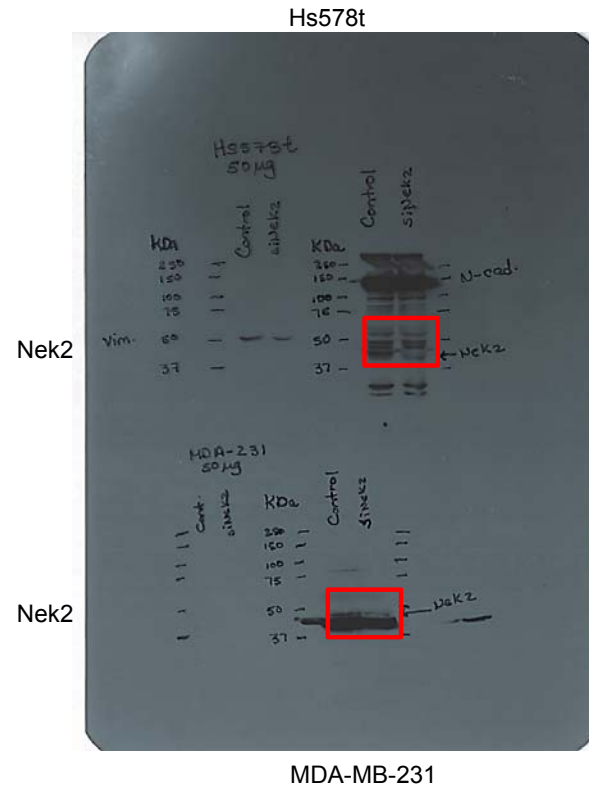

### Original Western Blots used for Supplementary Figure 6

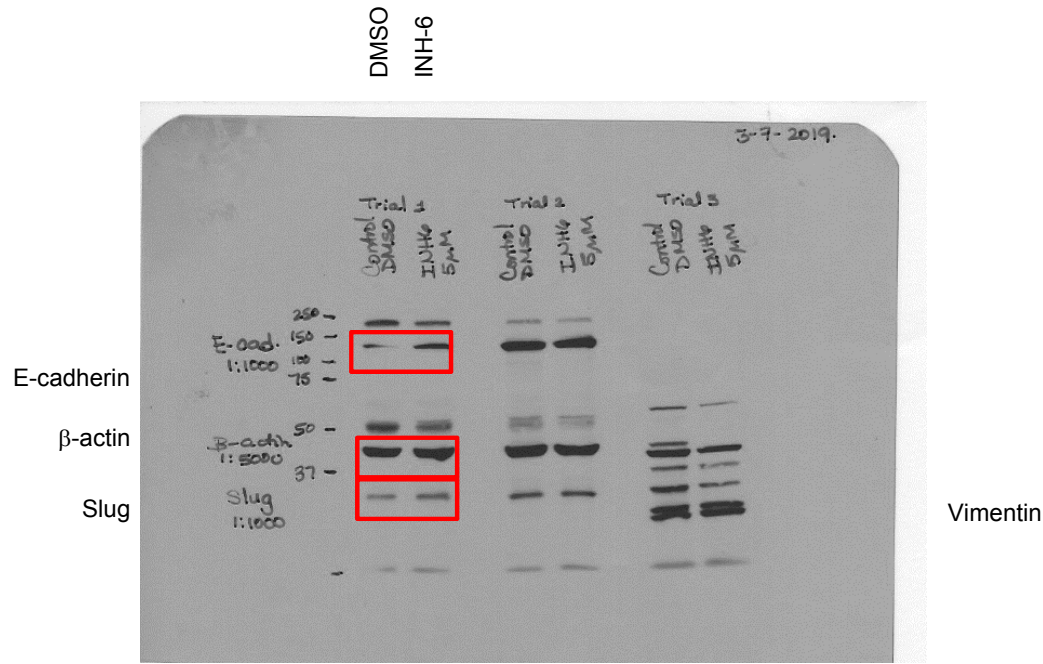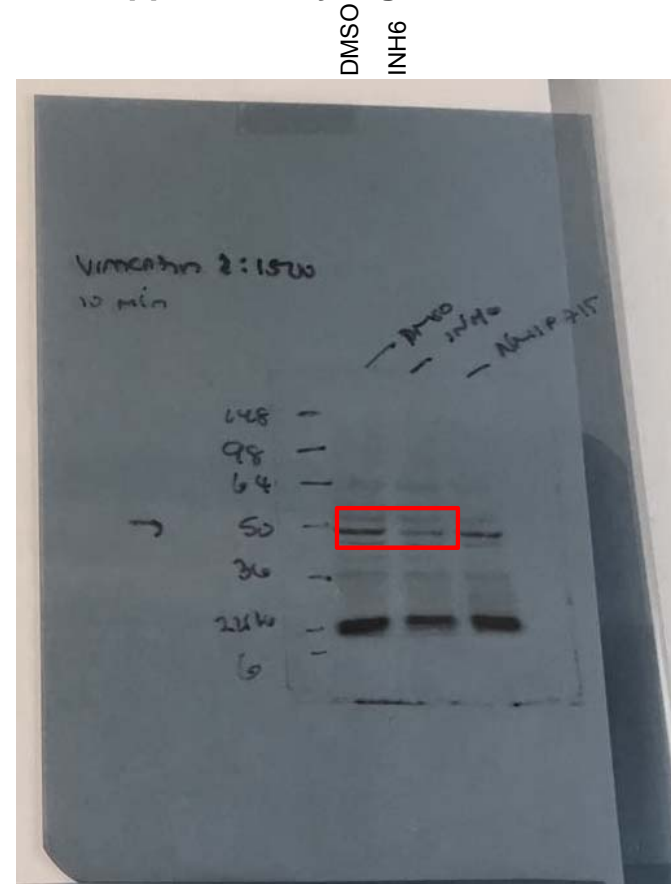

# Original Western Blots used for Supplementary Figure 6

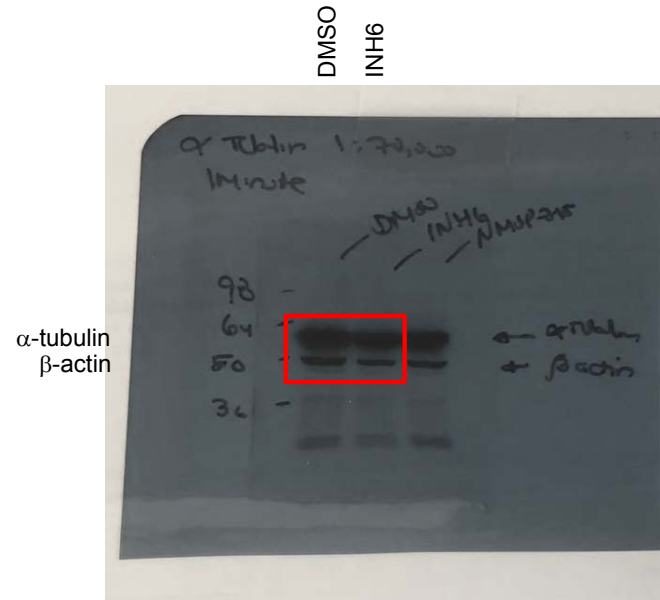

Supplement: 41598_2021_88512_MOESM1_ESM.pdf [file 41598_2021_88512_MOESM1_ESM.pdf]
